# Supplementary material for: The influence of drying and storage conditions on the volatilome and cannabinoid content of Cannabis sativa L. inflorescences
Source: PubMed Central journal article supplement (PMC11180634; doi:10.1007/s00216-024-05321-w), 2024-05-03
Supplement: 216_2024_5321_MOESM1_ESM.pdf [file 216_2024_5321_MOESM1_ESM.pdf]

1 **The influence of drying and storage conditions on the**  
2 **volatilome and cannabinoid content of *Cannabis sativa* L**  
3 **inflorescences**

4

5 **SUPPLEMENTARY MATERIAL**

6

7

8

9

10

11

12

13

14

15

16

17

18

19

20

21

22

23

24

25

26

27

28

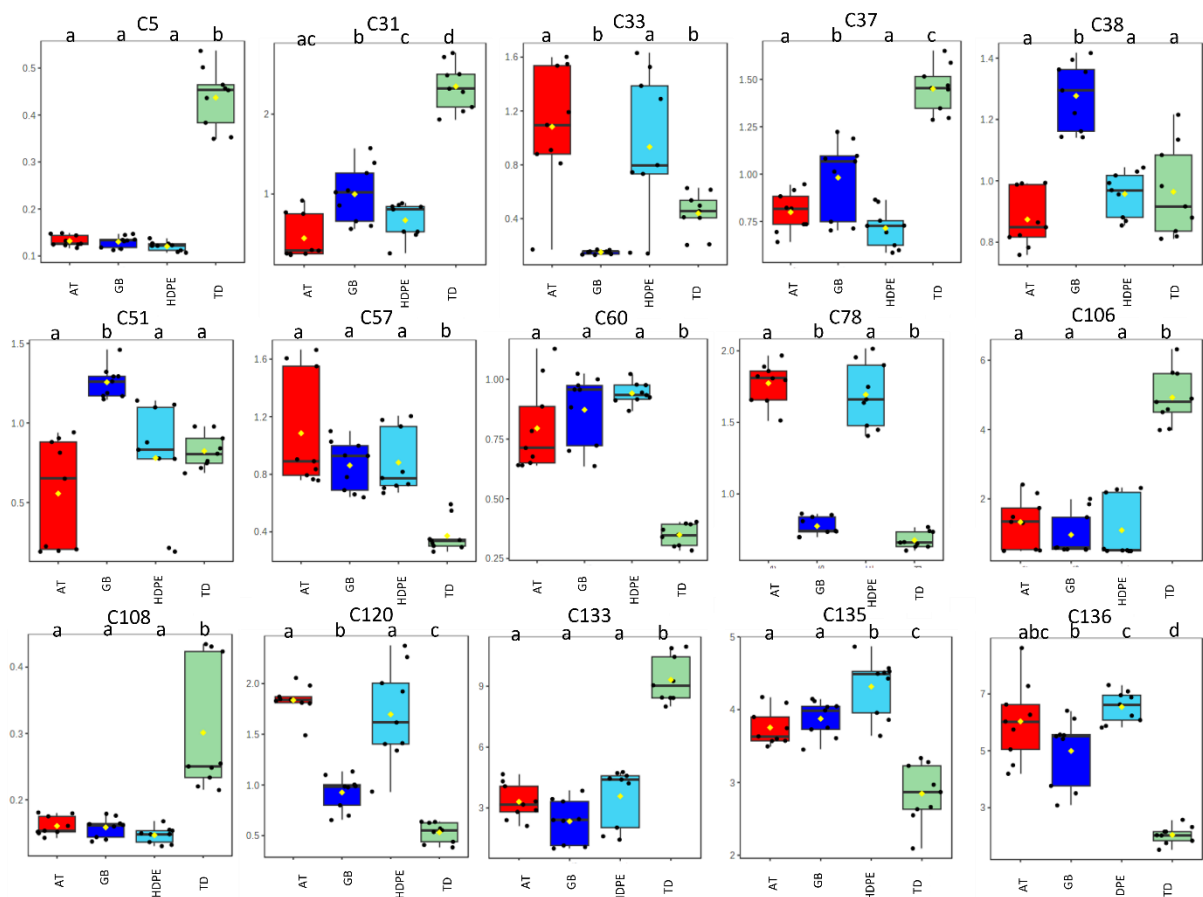

29

30 Figure S1: Boxplots of the selected VOCs based on Random Forest analysis in tray drying (TD, light  
 31 green) condition, and after 6 months storage in airtight box made of high-density polyethylene  
 32 (HDPE, light blue), lid tight brown glass bottle (GB, dark blue), open to air dry tray (AT, red). The same  
 33 letter indicates that mean values are not significantly different from each other ( $p > 0.05$ ). Different  
 34 letters indicate significant differences ( $p < 0.05$ , see Tables S1 and S5 for details). The black dots  
 35 represent the relative intensity of the selected compounds from all samples. The mean relative intensity  
 36 of each group is indicated with a yellow diamond.

37

38 Table S1: Complete list of VOCs detected in all cannabis samples.

| Code | VOC                                      | RI  | CAS       | Compound family  | Compound Sub group     |
|------|------------------------------------------|-----|-----------|------------------|------------------------|
| C1   | Acetone                                  | 487 | 67-64-1   | ketones          |                        |
| C2   | Dimethyl sulfide                         | 520 | 75-18-3   | sulfur compound  |                        |
| C3   | Acetic acid                              | 610 | 64-19-7   | carboxylic acids |                        |
| C4   | 1,3-Pentadiene, 2-methyl-                | 624 | 1118-58-7 | alkene           |                        |
| C5   | Butanal, 3-methyl-                       | 652 | 590-86-3  | aldehydes        |                        |
| C6   | 1-Propene, 3-propoxy-                    | 684 | 1471-03-0 | alkenes          |                        |
| C7   | Butanal, 2-methyl-                       | 662 | 96-17-3   | aldehydes        |                        |
| C8   | Furan, 2-ethyl-                          | 703 | 3208-16-0 | furans           |                        |
| C9   | Propanoic acid, ethyl ester              | 712 | 105-37-3  | esters           | carboxylic acid esters |
| C10  | Propanoic acid, 2-methyl-, ethyl ester   | 756 | 97-62-1   | esters           | fatty acid esters      |
| C11  | Hexane, 2,3-dimethyl-                    | 760 | 584-94-1  | alkanes          |                        |
| C12  | Methyl isovalerate                       | 776 | 556-24-1  | esters           | fatty acid esters      |
| C13  | Octane                                   | 800 | 111-65-9  | alkanes          |                        |
| C14  | Hexanal                                  | 801 | 66-25-1   | aldehydes        |                        |
| C15  | Butanoic acid, ethyl ester               | 802 | 105-54-4  | esters           | fatty acid esters      |
| C16  | 2-Butenoic acid, 3-methyl-, methyl ester | 842 | 924-50-5  | esters           | fatty acids esters     |
| C17  | Butanoic acid, 2-methyl-, ethyl ester    | 849 | 7452-79-1 | esters           | fatty acid esters      |
| C18  | Butanoic acid, 3-methyl-, ethyl ester    | 853 | 108-64-5  | esters           | fatty acid esters      |
| C19  | 2-Hexenal, (E)-                          | 854 | 6728-26-3 | aldehydes        |                        |
| C20  | 1-Hexanol                                | 868 | 111-27-3  | alcohols         |                        |
| C21  | Heptanal                                 | 901 | 111-71-7  | aldehydes        |                        |

|     |                                          |      |            |           |                   |
|-----|------------------------------------------|------|------------|-----------|-------------------|
| C22 | 5,5-Dimethyl-1-vinylbicyclo[2.1.1]hexane | 921  | 16626-39-4 | alkanes   |                   |
| C23 | 2-Butenoic acid, 3-methyl-, ethyl ester  | 924  | 638-10-8   | esters    | fatty acid esters |
| C24 | $\alpha$ -Thujene                        | 929  | 2867-05-02 | terpenes  | monoterpenes      |
| C25 | $\alpha$ -Pinene                         | 937  | 80-56-8    | terpenes  | monoterpenes      |
| C26 | Camphene                                 | 952  | 79-92-5    | terpenes  | monoterpenes      |
| C27 | 2,4(10)-Thujadiene                       | 956  | 36262-09-6 | terpenes  | monoterpenes      |
| C28 | Benzaldehyde                             | 962  | 100-52-7   | aldehydes |                   |
| C29 | $\beta$ -Pinene                          | 943  | 18172-67-3 | terpenes  | monoterpenes      |
| C30 | Sulcatone                                | 986  | 110-93-0   | ketones   |                   |
| C31 | 2,2,4,6,6-Pentamethylheptane             | 990  | 13475-82-6 | alkanes   |                   |
| C32 | $\beta$ -Myrcene                         | 991  | 123-35-3   | terpenes  | monoterpenes      |
| C33 | Decane                                   | 1000 | 124-18-5   | alkanes   |                   |
| C34 | $\alpha$ -Phellandrene                   | 1005 | 99-83-2    | terpenes  | monoterpenes      |
| C35 | 3-Carene                                 | 1011 | 13466-78-9 | terpenes  | monoterpenes      |
| C36 | Acetic acid, hexyl ester                 | 1011 | 142-92-7   | esters    | carboxylic esters |
| C37 | Terpinolene                              | 1088 |            | terpenes  | monoterpenes      |
| C38 | <i>p</i> -Cymene                         | 1025 | 99-87-6    | terpenes  | monoterpenes      |
| C39 | D-Limonene                               | 1031 | 5989-27-5  | terpenes  | monoterpenes      |
| C40 | $\beta$ -Phellandrene                    | 1031 | 555-10-2   | terpenes  | monoterpenes      |
| C41 | Eucalyptol                               | 1032 | 470-82-6   | terpenes  | monoterpenoids    |
| C42 | Benzyl alcohol                           | 1036 | 100-51-6   | alcohols  |                   |
| C43 | $\beta$ -Ocimene                         | 1049 | 3779-61-1  | terpenes  | monoterpenes      |
| C44 | Unknown 2                                | 1049 |            |           |                   |
| C45 | $\gamma$ -Terpinene                      | 1060 | 99-85-4    | terpenes  | monoterpenes      |
| C46 | 4-Thujanol                               | 1070 | 17699-16-0 | terpenes  | monoterpenoids    |
| C47 | 1-Octanol                                | 1070 | 111-87-5   | alcohols  | fatty alcohols    |
| C48 | Linalool oxide                           | 1074 | 5989-33-3  | furans    |                   |
| C49 | $\alpha$ -Terpinolene                    | 1088 | 586-62-9   | terpenes  | monoterpenes      |

|     |                                         |      |            |           |                   |
|-----|-----------------------------------------|------|------------|-----------|-------------------|
| C50 | Fenchone                                | 1096 | 1195-79-5  | terpenes  | monoterpenoids    |
| C51 | <i>p</i> -Ocimene                       | 1090 | 1195-32-0  | terpenes  | monoterpenes      |
| C52 | Undecane                                | 1100 | 1120-21-4  | alkanes   |                   |
| C53 | Linalool                                | 1099 | 78-70-6    | terpenes  | monoterpenoids    |
| C54 | Nonanal                                 | 1104 | 124-19-6   | aldehydes |                   |
| C55 | Propanoic acid, hexyl ester             | 1108 | 2445-76-3  | esters    | fatty acid esters |
| C56 | Acetic acid, heptyl ester               | 1112 | 112-06-1   | esters    | fatty acid esters |
| C57 | <i>Phenylethyl Alcohol</i>              | 1116 | 60-12-8    | alcohols  |                   |
| C58 | Fenchol                                 | 1114 | 1632-73-1  | terpenes  | monoterpenoids    |
| C59 | trans-2-Pinanol                         | 1132 | 4948-29-2  | terpenes  | monoterpenoids    |
| C60 | <i>4-Acetyl-1-methylcyclohexene</i>     | 1137 | 6090-09-1  | ketones   |                   |
| C61 | L-Pinocarveol                           | 1139 | 547-61-5   | alcohols  |                   |
| C62 | Benzyl nitrile                          | 1144 | 140-29-4   | aromatics |                   |
| C63 | 2-Pinanol                               | 1132 | 4948-29-2  | terpenes  | monoterpenoids    |
| C64 | Ipsdienol                               | 1147 | 35628-00-3 | alcohols  |                   |
| C65 | Camphor                                 | 1145 | 76-22-2    | terpenes  | monoterpenoids    |
| C66 | Myrcenone                               | 1145 | 539-70-8   | ketones   |                   |
| C67 | Camphene hydrate                        | 1148 | 465-31-6   | terpenes  | monoterpenoids    |
| C68 | 1,5,7-Octatrien-3-ol, 2,6-dimethyl-     | 1167 | 29414-56-0 | terpenes  | monoterpenoids    |
| C69 | 2-Methyl-6-methylene-1,7-octadien-3-one | 1145 | 22459-10-5 | terpenes  | monoterpenoids    |
| C70 | endo-Borneol                            | 1167 | 507-70-0   | terpenes  | monoterpenoids    |
| C71 | Pinocamphone                            | 1160 | 547-60-4   | terpenes  | monoterpenoids    |
| C72 | Terpinen-4-ol                           | 1182 | 20126-76-5 | terpenes  | monoterpenoids    |
| C73 | <i>p</i> -Cymen-8-ol                    | 1183 | 1197-01-9  | alcohols  | phenylpropanes    |
| C74 | 4-Methylacetophenone                    | 1183 | 122-00-9   | ketones   |                   |
| C75 | <i>n</i> -Hexyl butanoate               | 1192 | 2639-63-6  | esters    | fatty acid esters |
| C76 | $\alpha\pm$ -Terpineol                  | 1189 | 98-55-5    | terpenes  | monoterpenoids    |

|      |                          |      |            |           |                        |
|------|--------------------------|------|------------|-----------|------------------------|
| C77  | Dodecane                 | 1200 | 112-40-3   | alkanes   |                        |
| C78  | (-)-Myrtenol             | 1213 | 19894-97-4 | terpenes  | monoterpenoids         |
| C79  | Acetic acid, octyl ester | 1210 | 112-14-1   | esters    | carboxylic acid esters |
| C80  | Fenchyl acetate          | 1224 | 13851-11-1 | terpenes  | monoterpenoids         |
| C81  | Carveol                  | 1219 | 99-48-9    | terpenes  | monoterpenoids         |
| C82  | $\alpha$ -Citronellol    | 1213 | 6812-78-8  | alcohols  |                        |
| C83  | Hexyl 2-methylbutyrate   | 1236 | 10032-15-2 | esters    | fatty acid esters      |
| C84  | (-)-Carvone              | 1245 | 6485-40-1  | terpenes  | monoterpenoids         |
| C85  | 5-Decen-1-ol, (E)-       | 1247 | 56578-18-8 | alcohols  |                        |
| C86  | (Z)-4-Decen-1-ol         | 1257 | 57074-37-0 | alcohols  |                        |
| C87  | Myrtanol                 | 1261 | 51152-12-6 | terpenes  | monoterpenoids         |
| C88  | Bornyl acetate           | 1285 | 76-49-3    | terpenes  | monoterpenoids         |
| C89  | Indole                   | 1295 | 120-72-9   | Indoles   |                        |
| C90  | Benzene, (2-nitroethyl)- | 1304 | 6125-24-2  | aromatics |                        |
| C91  | Myrtenyl acetate         | 1327 | 1079-01-2  | terpenes  | monoterpenoids         |
| C92  | 2,4-Decadien-1-ol        | 1307 | 14507-02-9 | alcohols  |                        |
| C93  | Tridecane                | 1300 | 629-50-5   | alkanes   |                        |
| C94  | Methyl anthranilate      | 1343 | 134-20-3   | esters    | carboxylic acid ester  |
| C95  | Citronellyl acetate      | 1353 | 150-84-5   | terpenes  | monoterpenoids         |
| C96  | 8-Hydroxylinalool        | 1361 | 64142-78-5 | alcohols  |                        |
| C97  | Copaene                  | 1376 | 3856-25-5  | terpenes  | sesquiterpenes         |
| C98  | Ylangene                 | 1372 | 14912-44-8 | terpenes  | sesquiterpenes         |
| C99  | Myrtanyl acetate         | 1387 | 29021-36-1 | terpenes  | monoterpenoids         |
| C100 | Hexyl caproate           | 1384 | 6378-65-0  | esters    | fatty acid esters      |
| C101 | Alloisolongifolene       | 1409 | 87064-18-4 | terpenes  | sesquiterpenes         |
| C102 | Selina-5,11-diene        | 1447 | 52026-55-8 | terpenes  | sesquiterpenes         |
| C103 | $\alpha$ -Gurjunene      | 1409 | 489-40-7   | terpenes  | sesquiterpenes         |
| C104 | Caryophyllene            | 1419 | 87-44-5    | terpenes  | sesquiterpenes         |

|      |                                                                                                                  |      |             |           |                |
|------|------------------------------------------------------------------------------------------------------------------|------|-------------|-----------|----------------|
| C105 | $\alpha$ -Bergamotene                                                                                            | 1435 | 17699-05-7  | terpenes  | sesquiterpenes |
| C106 | <i>Unknown 3</i>                                                                                                 | 1454 |             |           |                |
| C107 | Germacrene D                                                                                                     | 1481 | 23986-74-5  | terpenes  | sesquiterpenes |
| C108 | <i>Perillyl acetate</i>                                                                                          | 1436 | 15111-96-3  | terpenes  | monoterpenoids |
| C109 | 8,10-Dodecadien-1-ol                                                                                             | 1473 | 33956-49-9  | alcohols  |                |
| C110 | Aromandendrene                                                                                                   | 1440 | 489-39-4    | terpenes  | sesquiterpenes |
| C111 | Bicyclo[3.1.1]heptane, 6-methyl-2-methylene-6-(4-methyl-3-pentenyl)-, [1R-(1 $\alpha$ ,5 $\alpha$ ,6 $\beta$ )]- | 1446 | 55123-21-2  | terpenes  | monoterpenoids |
| C112 | $\gamma$ -Gurjunene                                                                                              | 1473 | 22567-17-5  | terpenes  | sesquiterpenes |
| C113 | (-)-Aristolene                                                                                                   | 1447 | 6831-16-9   | terpenes  | sesquiterpenes |
| C114 | Humulene                                                                                                         | 1454 | 6753-98-6   | terpenes  | sesquiterpenes |
| C115 | $\alpha$ -Farnesene                                                                                              | 1508 | 502-61-4    | terpenes  | sesquiterpenes |
| C116 | Alloaromadendrene                                                                                                | 1461 | 25246-27-9  | terpenes  | sesquiterpenes |
| C117 | $\alpha$ -Elemene                                                                                                | 1454 | 5951-67-7   | terpenes  | sesquiterpenes |
| C118 | 4,5-Di-epi-aristolochene                                                                                         | 1470 | 54868-40-5  | terpenes  | sesquiterpenes |
| C119 | $\beta$ -Guaiene                                                                                                 | 1490 | 88-84-6     | terpenes  | sesquiterpenes |
| C120 | <i>Unknown</i>                                                                                                   | 1500 |             |           |                |
| C121 | Naphthalene, 1,2,3,4,4a,5,6,7-octahydro-4a,8-dimethyl-2-(1-methylethenyl)-                                       | 1492 | 103827-22-1 | aromatics |                |
| C122 | Valencene                                                                                                        | 1492 | 4630-07-3   | terpenes  | sesquiterpenes |
| C123 | $\alpha\pm$ -Farnesene                                                                                           | 1508 | 502-61-4    | terpenes  | sesquiterpenes |
| C124 | Dihydroagarofuran                                                                                                | 1550 | 5956-12-7   | furans    |                |
| C125 | $\beta$ -Curcumene                                                                                               | 1514 | 28976-67-2  | terpenes  | sesquiterpenes |

|             |                                                                      |             |                   |                 |                         |
|-------------|----------------------------------------------------------------------|-------------|-------------------|-----------------|-------------------------|
| C126        | $\alpha$ -Selinene                                                   | 1494        | 473-13-2          | terpenes        | sesquiterpenes          |
| C127        | $\beta$ -Bisabolene                                                  | 1509        | 495-61-4          | terpenes        | sesquiterpenes          |
| C128        | $\beta$ -Sesquiphellandrene                                          | 1524        | 20307-83-9        | terpenes        | sesquiterpenes          |
| C129        | $\gamma$ -Bisabolene                                                 | 1514        | 13062-00-5        | terpenes        | sesquiterpenes          |
| C130        | Naphthalene, decahydro-4a-methyl-1-methylene-7-(1-methylethylidene)- | 1544        | 58893-88-2        | aromatics       |                         |
| C131        | $\alpha$ -Bisabolene                                                 | 1512        | 25532-79-0        | terpenes        | sesquiterpenes          |
| C132        | Selina-3,7(11)-diene                                                 | 1542        | 6813-21-4         | terpenes        | sesquiterpenes          |
| <i>C133</i> | <i>(-)-helminthogermacrene</i>                                       | <i>1570</i> | <i>75023-40-4</i> | <i>terpenes</i> | <i>sesquiterpenes</i>   |
| C134        | Unknown 1                                                            | 1577        |                   |                 |                         |
| <i>C135</i> | <i>Nerolidol</i>                                                     | <i>1563</i> | <i>7212-44-4</i>  | <i>terpenes</i> | <i>sesquiterpenoids</i> |
| <i>C136</i> | <i>Caryophyllene oxide</i>                                           | <i>1581</i> | <i>1139-30-6</i>  | <i>terpenes</i> | <i>sesquiterpenoids</i> |
| C137        | Guaiol                                                               | 1596        | 489-86-1          | terpenes        | sesquiterpenoids        |
| C138        | $\alpha$ -epi-7-epi-5-Eudesmol                                       | 1616        | 446050-56-2       | terpenes        | sesquiterpenoids        |
| C139        | Humulene oxide II                                                    | 1606        | 19888-34-7        | terpenes        | sesquiterpenoids        |
| C140        | Unknown 4                                                            | 1662        |                   |                 |                         |
| C141        | Agarospinol                                                          | 1644        | 19431-80-2        | terpenes        | sesquiterpenoids        |
| C142        | Hinesol                                                              | 1635        | 23811-08-7        | terpenes        | sesquiterpenoids        |
| C143        | $\beta$ -Selinol                                                     | 1649        | 473-15-4          | terpenes        | sesquiterpenoids        |
| C144        | Unknown 5                                                            | 1653        |                   |                 |                         |
| C145        | 7-epi-a-Eudesmol                                                     | 1658        | 123123-38-6       | terpenes        | sesquiterpenoids        |
| C146        | 8-Heptadecene                                                        | 1675        | 2579-04-6         | alkenes         |                         |
| C147        | Bulnesol                                                             | 1667        | 22451-73-6        | terpenes        | sesquiterpenoids        |
| C148        | Levomenol                                                            | 1695        | 23089-26-1        | terpenes        | sesquiterpenoids        |
| C149        | Eudesm-7(11)-en-4-ol                                                 | 1692        | 473-04-1          | terpenes        | sesquiterpenoids        |

In italics the top discriminatory VOCs obtained with RF.



39 Table S2: Significant metabolites based on Volcano plot analysis. FC=fold change, raw.pval= p-value  
 40 based on t-test, FD=freeze drying.

| Feature Name                                                                                                     | Chemical Group | Chemical subgroup      | Code | FC   | log2(FC) | raw.pval | LOG10(p) |
|------------------------------------------------------------------------------------------------------------------|----------------|------------------------|------|------|----------|----------|----------|
| <b>Compounds negatively affected by FD</b>                                                                       |                |                        |      |      |          |          |          |
| 2-Hexenal, (E)-                                                                                                  | aldehydes      |                        | C19  | 0.16 | -2.60    | 0.00     | 3.78     |
| Butanal, 3-methyl-                                                                                               | aldehydes      |                        | C5   | 0.10 | -3.37    | 0.00     | 8.48     |
| Butanal, 2-methyl-                                                                                               | aldehydes      |                        | C7   | 0.04 | -4.59    | 0.00     | 7.52     |
| 5,5-Dimethyl-1-vinylbicyclo[2.1.1]hexane                                                                         | alkanes        |                        | C22  | 0.18 | -2.50    | 0.04     | 1.36     |
| 2,2,4,6,6-Pentamethylheptane                                                                                     | alkanes        |                        | C31  | 0.09 | -3.40    | 0.00     | 8.80     |
| Undecane                                                                                                         | alkanes        |                        | C52  | 0.08 | -3.61    | 0.00     | 8.92     |
| Dodecane                                                                                                         | alkanes        |                        | C77  | 0.40 | -1.31    | 0.04     | 1.43     |
| CBD                                                                                                              | Cannabinoids   |                        | CBD  | 0.10 | -3.26    | 0.03     | 1.49     |
| CBG                                                                                                              | Cannabinoids   |                        | CBG  | 0.04 | -4.53    | 0.00     | 4.60     |
| THC                                                                                                              | Cannabinoids   |                        | THC  | 0.16 | -2.61    | 0.00     | 3.86     |
| Propanoic acid, 2-methyl-, ethyl ester                                                                           | esters         | carboxylic acid esters | C10  | 0.23 | -2.14    | 0.00     | 2.31     |
| Propanoic acid, ethyl ester                                                                                      | esters         | carboxylic acid esters | C9   | 0.22 | -2.19    | 0.01     | 2.29     |
| Butanoic acid, ethyl ester                                                                                       | esters         | fatty acid esters      | C15  | 0.22 | -2.16    | 0.00     | 2.30     |
| Butanoic acid, 2-methyl-, ethyl ester                                                                            | esters         | fatty acid esters      | C17  | 0.11 | -3.15    | 0.00     | 3.26     |
| Propanoic acid, hexyl ester                                                                                      | esters         | fatty acid esters      | C55  | 0.20 | -2.30    | 0.01     | 2.14     |
| Methyl isovalerate                                                                                               | esters         | fatty acid esters      | C12  | 0.22 | -2.19    | 0.01     | 2.29     |
| Furan, 2-ethyl-                                                                                                  | furans         |                        | C8   | 0.14 | -2.86    | 0.00     | 4.73     |
| Myrcenone                                                                                                        | ketones        |                        | C66  | 0.20 | -2.33    | 0.01     | 2.23     |
| $\alpha$ -Phellandrene                                                                                           | terpenes       | monoterpenes           | C34  | 0.22 | -2.18    | 0.00     | 3.58     |
| 3-Carene                                                                                                         | terpenes       | monoterpenes           | C35  | 0.08 | -3.61    | 0.00     | 5.25     |
| Terpinolene                                                                                                      | terpenes       | monoterpenes           | C37  | 0.35 | -1.51    | 0.00     | 6.93     |
| D-Limonene                                                                                                       | terpenes       | monoterpenes           | C39  | 0.33 | -1.60    | 0.00     | 4.69     |
| $\beta$ -Phellandrene                                                                                            | terpenes       | monoterpenes           | C40  | 0.09 | -3.52    | 0.00     | 3.13     |
| $\alpha$ -Terpinolene                                                                                            | terpenes       | monoterpenes           | C49  | 0.08 | -3.59    | 0.00     | 11.32    |
| $\alpha$ -Thujene                                                                                                | terpenes       | monoterpenes           | C24  | 0.32 | -1.63    | 0.01     | 1.94     |
| $\alpha$ -Pinene                                                                                                 | terpenes       | monoterpenes           | C25  | 0.23 | -2.13    | 0.00     | 5.73     |
| Camphene                                                                                                         | terpenes       | monoterpenes           | C26  | 0.18 | -2.46    | 0.00     | 5.50     |
| 2,4(10)-Thujadiene                                                                                               | terpenes       | monoterpenes           | C27  | 0.28 | -1.84    | 0.00     | 3.40     |
| $\beta$ -Pinene                                                                                                  | terpenes       | monoterpenes           | C29  | 0.46 | -1.11    | 0.01     | 1.94     |
| $\beta$ -Myrcene                                                                                                 | terpenes       | monoterpenes           | C32  | 0.04 | -4.56    | 0.00     | 4.73     |
| Perillyl acetate                                                                                                 | terpenes       | monoterpenoids         | C108 | 0.29 | -1.80    | 0.00     | 3.44     |
| Camphor                                                                                                          | terpenes       | monoterpenoids         | C65  | 0.28 | -1.82    | 0.00     | 3.43     |
| Myrtenyl acetate                                                                                                 | terpenes       | monoterpenoids         | C91  | 0.27 | -1.87    | 0.00     | 3.35     |
| Bicyclo[3.1.1]heptane, 6-methyl-2-methylene-6-(4-methyl-3-pentenyl)-, [1R-(1 $\alpha$ ,5 $\alpha$ ,6 $\beta$ )]- | terpenes       | monoterpenoids         | C111 | 0.13 | -2.95    | 0.00     | 2.88     |

|                                            |           |                       |      |       |       |      |       |
|--------------------------------------------|-----------|-----------------------|------|-------|-------|------|-------|
| 2-Methyl-6-methylene-1,7-octadien-3-one    | terpenes  | monoterpenoids        | C69  | 0.21  | -2.27 | 0.01 | 2.27  |
| Fenchyl acetate                            | terpenes  | monoterpenoids        | C80  | 0.27  | -1.88 | 0.00 | 3.36  |
| Alloisolongifolene                         | terpenes  | sesquiterpenes        | C101 | 0.25  | -1.98 | 0.00 | 3.26  |
| $\gamma$ -Gurjunene                        | terpenes  | sesquiterpenes        | C112 | 0.24  | -2.04 | 0.00 | 2.67  |
| (-)-Aristolene                             | terpenes  | sesquiterpenes        | C113 | 0.18  | -2.44 | 0.01 | 1.90  |
| $\alpha$ -Elemene                          | terpenes  | sesquiterpenes        | C117 | 0.26  | -1.96 | 0.00 | 2.40  |
| $\beta$ -Bisabolene                        | terpenes  | sesquiterpenes        | C127 | 0.22  | -2.19 | 0.01 | 2.29  |
| $\gamma$ -Bisabolene                       | terpenes  | sesquiterpenes        | C129 | 0.10  | -3.35 | 0.00 | 4.30  |
| (-)-helminthogermacrene                    | terpenes  | sesquiterpenes        | C133 | 0.02  | -5.64 | 0.00 | 7.96  |
| Unknown 3                                  |           |                       | C106 | 0.08  | -3.57 | 0.00 | 9.00  |
| Unknown 2                                  |           |                       | C44  | 0.20  | -2.35 | 0.00 | 3.24  |
| <b>Compounds positively affected by FD</b> |           |                       |      |       |       |      |       |
| Phenylethyl Alcohol                        | alcohols  |                       | C57  | 3.17  | 1.66  | 0.00 | 4.00  |
| Heptanal                                   | aldehydes |                       | C21  | 5.92  | 2.57  | 0.00 | 2.97  |
| Benzaldehyde                               | aldehydes |                       | C28  | 2.35  | 1.23  | 0.02 | 1.72  |
| Nonanal                                    | aldehydes |                       | C54  | 9.17  | 3.20  | 0.00 | 7.39  |
| Hexane, 2,3-dimethyl-                      | alkanes   |                       | C11  | 4.78  | 2.26  | 0.01 | 2.25  |
| Unknown                                    |           |                       | C120 | 16.96 | 4.08  | 0.00 | 11.18 |
| Decane                                     | alkanes   |                       | C33  | 11.58 | 3.53  | 0.00 | 2.68  |
| Benzyl nitrile                             | aromatics |                       | C62  | 2.03  | 1.02  | 0.02 | 1.81  |
| Acetic acid, heptyl ester                  | esters    | fatty acid esters     | C56  | 13.64 | 3.77  | 0.04 | 1.41  |
| Acetic acid, octyl ester                   | esters    | fatty alcohols esters | C79  | 4.11  | 2.04  | 0.00 | 2.39  |
| Indole                                     | Indoles   |                       | C89  | 2.91  | 1.54  | 0.02 | 1.77  |
| Sulcatone                                  | ketones   |                       | C30  | 16.62 | 4.05  | 0.00 | 6.87  |
| 4-Acetyl-1-methylcyclohexene               | ketones   |                       | C60  | 9.71  | 3.28  | 0.00 | 8.53  |
| 1,5,7-Octatrien-3-ol, 2,6-dimethyl-        | terpenes  | monoterpenoids        | C68  | 12.76 | 3.67  | 0.02 | 1.76  |
| $\alpha$ -Terpineol                        | terpenes  | monoterpenoids        | C76  | 2.17  | 1.12  | 0.02 | 1.63  |
| (-)-Myrtenol                               | terpenes  | monoterpenoids        | C78  | 16.06 | 4.01  | 0.00 | 10.89 |
| Caryophyllene oxide                        | terpenes  | sesquiterpenoids      | C136 | 8.80  | 3.14  | 0.00 | 7.51  |
| Guaiol                                     | terpenes  | sesquiterpenoids      | C137 | 2.18  | 1.12  | 0.02 | 1.61  |
| $\alpha$ -epi-7-epi-5-Eudesmol             | terpenes  | sesquiterpenoids      | C138 | 2.68  | 1.42  | 0.04 | 1.38  |
| $\beta$ -Selinenol                         | terpenes  | sesquiterpenoids      | C143 | 3.81  | 1.93  | 0.04 | 1.40  |
| 7-epi-a-Eudesmol                           | terpenes  | sesquiterpenoids      | C145 | 2.16  | 1.11  | 0.05 | 1.32  |
| Unknown 1                                  |           |                       | C134 | 2.91  | 1.54  | 0.00 | 3.01  |
| Unknown 4                                  |           |                       | C140 | 2.28  | 1.19  | 0.01 | 1.85  |
| Unknown 5                                  |           |                       | C144 | 3.08  | 1.62  | 0.03 | 1.60  |

41

42

43 Supplementary table S3. Top 25 most significant metabolites (blu= negatively affected by freeze drying,  
 44 red=positively affected by freeze drying) with their aroma description. FC=fold change, raw.pval= p-  
 45 value based on t-test

| Feature Name                 | Chemical Group | Chemical subgroup | Code | FC       | log2(FC) | raw.pval  | LOG10(p) | *Aroma descriptors                                                |
|------------------------------|----------------|-------------------|------|----------|----------|-----------|----------|-------------------------------------------------------------------|
| $\alpha$ -Terpinolene        | terpenes       | monoterpenes      | C49  | 0.083328 | -3.5851  | 4.82E-12  | 11.317   | woody,<br>woody<br>earthy<br>spicy                                |
| Unknown 3                    |                |                   | C106 | 0.084053 | -3.5726  | 9.95E-10  | 9.0023   |                                                                   |
| Undecane                     | alkanes        |                   | C52  | 0.082067 | -3.6071  | 1.20E-09  | 8.9225   | musty,<br>green                                                   |
| 2,2,4,6,6-Pentamethylheptane | alkanes        | branched alkanes  | C31  | 0.094904 | -3.3974  | 1.58E-09  | 8.801    | cedar and<br>musk<br>fragrance                                    |
| Butanal, 3-methyl-           | aldehydes      | aldehydes         | C5   | 0.096598 | -3.3719  | 3.30E-09  | 8.4811   | gasoline-<br>like to<br>odorless                                  |
| (-)-Helminthogermacrene      | terpenes       | sesquiterpenes    | C133 | 0.02001  | -5.6432  | 1.10E-08  | 7.9585   | woody                                                             |
| Butanal, 2-methyl-           | aldehydes      | aldehydes         | C7   | 0.041443 | -4.5927  | 2.99E-08  | 7.5246   | pine-like<br>caramel,<br>buttery,<br>baked<br>bread, and<br>nutty |
| Terpinolene                  | terpenes       | monoterpenes      | C37  | 0.35112  | -1.51    | 1.16E-07  | 6.934    | fruity                                                            |
| $\alpha$ -Pinene             | terpenes       | monoterpenes      | C25  | 0.22768  | -2.1349  | 1.85E-06  | 5.7329   | malty                                                             |
| Camphene                     | terpenes       | monoterpenes      | C26  | 0.18167  | -2.4606  | 3.17E-06  | 5.499    | balsamic,<br>sweet,<br>myrrh,<br>orange<br>flower                 |
| 3-Carene                     | terpenes       | monoterpenes      | C35  | 0.082083 | -3.6068  | 5.65E-06  | 5.2478   | ethereal                                                          |
| $\beta$ -Myrcene             | terpenes       | monoterpenes      | C32  | 0.042494 | -4.5566  | 1.87E-05  | 4.7287   | rum, cocoa<br>note                                                |
| Furan, 2-ethyl-              | furans         | furans            | C8   | 0.13776  | -2.8598  | 1.88E-05  | 4.7268   | earthy,<br>woody and<br>herbaceous<br>odor                        |
| D-Limonene                   | terpenes       | monoterpenes      | C39  | 0.33039  | -1.5978  | 2.03E-05  | 4.692    | green                                                             |
| CBG                          | Cannabinoids   | Cannabinoids      | CBG  | 0.043373 | -4.5271  | 2.53E-05  | 4.5971   | camphor-<br>like                                                  |
| $\gamma$ -Bisabolene         | terpenes       | sesquiterpenes    | C129 | 0.098041 | -3.3505  | 5.05E-05  | 4.2967   | dry woody,<br>resinous-<br>piney                                  |
| THC                          | Cannabinoids   | Cannabinoids      | THC  | 0.16412  | -2.6072  | 0.0001372 | 3.8626   | citrus-like                                                       |
| 2-Hexenal, (E)-              | aldehydes      | aldehydes         | C19  | 0.16484  | -2.6009  | 0.0001671 | 3.777    | pine-like                                                         |
| Unknown                      |                |                   | C120 | 16.963   | 4.0843   | 6.54E-12  | 11.184   | sweet,<br>fresh, dry<br>wood,<br>spicy                            |
| (-)-Myrtenol                 | terpenes       | monoterpenes      | C78  | 16.055   | 4.005    | 1.28E-11  | 10.892   | sweet and<br>fruity                                               |

|                              |           |                      |      |        |        |          |        |                                     |
|------------------------------|-----------|----------------------|------|--------|--------|----------|--------|-------------------------------------|
| 4-Acetyl-1-methylcyclohexene | ketones   | ketones              | C60  | 9.7075 | 3.2791 | 2.98E-09 | 8.5259 | spice                               |
| Caryophyllene oxide          | terpenes  | sesquiterpenes       | C136 | 8.7982 | 3.1372 | 3.07E-08 | 7.5126 | herbal,<br>minty                    |
| Nonanal                      | aldehydes | aldehydes            | C54  | 9.1685 | 3.1967 | 4.05E-08 | 7.3921 | citrus-like<br>lemongrass           |
| Sulcatone                    | ketones   | ketones              | C30  | 16.617 | 4.0546 | 1.36E-07 | 6.8675 |                                     |
| Phenylethyl Alcohol          | alcohols  | aromatic<br>alcohols | C57  | 3.1691 | 1.6641 | 9.96E-05 | 4.0019 | floral,<br>sweet, with<br>rose note |

\*Aroma descriptors were sourced from Good Scents company database  
(<https://www.thegoodscentscompany.com/search3.php>.1988)

46

47

49 Table S4: Significant variables based on ANOVA and Tukey's post-hoc test. TD=tray drying,  
 50 HDPE=airtight box made of high-density polyethylene, AT=air dry tray, GB=lid tight brown glass  
 51 bottle; p.value <0.05

| Code | f.value | p.value    | FDR        | Tukey's HSD |         |         |         |         |
|------|---------|------------|------------|-------------|---------|---------|---------|---------|
| C5   | 294.47  | 2.2581e-23 | 3.2968e-21 | TD-AT       | GB-TD   | HDPE-TD |         |         |
| C78  | 237.56  | 6.1146e-22 | 4.4636e-20 | TD-AT       | GB-AT   | GB-TD   | HDPE-TD | HDPE-GB |
| C60  | 77.40   | 9.3275e-15 | 4.5394e-13 | TD-AT       | GB-TD   | HDPE-TD |         |         |
| C120 | 69.26   | 4.3694e-14 | 1.5948e-12 | TD-AT       | GB-AT   | GB-TD   | HDPE-TD | HDPE-GB |
| C136 | 65.83   | 8.7963e-14 | 2.5685e-12 | TD-AT       | GB-TD   | HDPE-TD | HDPE-GB |         |
| C8   | 46.51   | 9.0304e-12 | 2.1974e-10 | TD-AT       | GB-TD   | HDPE-TD |         |         |
| C37  | 37.36   | 1.4404e-10 | 3.0042e-09 | TD-AT       | GB-TD   | HDPE-TD | HDPE-GB |         |
| C7   | 34.87   | 3.3483e-10 | 6.1107e-09 | TD-AT       | GB-TD   | HDPE-TD |         |         |
| C31  | 32.28   | 8.4684e-10 | 1.3738e-08 | TD-AT       | GB-AT   | GB-TD   | HDPE-TD |         |
| C108 | 30.72   | 1.526e-09  | 2.228e-08  | TD-AT       | GB-TD   | HDPE-TD |         |         |
| C52  | 29.46   | 2.4903e-09 | 3.1346e-08 | TD-AT       | GB-AT   | GB-TD   | HDPE-TD | HDPE-GB |
| C135 | 29.37   | 2.5764e-09 | 3.1346e-08 | TD-AT       | HDPE-AT | GB-TD   | HDPE-TD |         |
| C57  | 27.46   | 5.5842e-09 | 6.2715e-08 | TD-AT       | GB-TD   | HDPE-TD |         |         |
| C133 | 23.28   | 3.4966e-08 | 3.6464e-07 | TD-AT       | GB-TD   | HDPE-TD |         |         |
| C32  | 21.95   | 6.5932e-08 | 6.4173e-07 | TD-AT       | GB-TD   | HDPE-TD |         |         |
| C38  | 20.77   | 1.1746e-07 | 1.0613e-06 | GB-AT       | GB-TD   | HDPE-GB |         |         |
| C94  | 20.67   | 1.2358e-07 | 1.0613e-06 | TD-AT       | GB-TD   | HDPE-TD |         |         |
| C106 | 19.69   | 2.0368e-07 | 1.6521e-06 | TD-AT       | GB-TD   | HDPE-TD |         |         |
| C35  | 15.31   | 2.3645e-06 | 1.783e-05  | TD-AT       | GB-TD   | HDPE-TD |         |         |
| C49  | 15.26   | 2.4425e-06 | 1.783e-05  | TD-AT       | GB-TD   | HDPE-TD |         |         |
| C33  | 15.00   | 2.8576e-06 | 1.9867e-05 | TD-AT       | GB-AT   | GB-TD   | HDPE-GB |         |
| C92  | 14.38   | 4.1802e-06 | 2.7741e-05 | TD-AT       | GB-TD   | HDPE-TD |         |         |
| C15  | 14.19   | 4.7296e-06 | 3.0023e-05 | TD-AT       | GB-TD   | HDPE-TD |         |         |
| C12  | 14.06   | 5.119e-06  | 3.0906e-05 | TD-AT       | GB-TD   | HDPE-TD |         |         |
| C9   | 14.01   | 5.2921e-06 | 3.0906e-05 | TD-AT       | GB-TD   | HDPE-TD |         |         |
| C69  | 13.66   | 6.5932e-06 | 3.7023e-05 | TD-AT       | GB-TD   | HDPE-TD |         |         |
| C40  | 13.59   | 6.9348e-06 | 3.7499e-05 | TD-AT       | GB-TD   | HDPE-TD |         |         |
| C4   | 10.90   | 4.3369e-05 | 0.0002261  | HDPE-AT     | GB-TD   | HDPE-TD |         |         |
| C105 | 10.37   | 6.368e-05  | 0.0003206  | TD-AT       | GB-TD   | HDPE-TD |         |         |

|      |       |            |           |         |         |         |         |
|------|-------|------------|-----------|---------|---------|---------|---------|
| C122 | 10.04 | 8.1343e-05 | 0.0003959 | TD-AT   | GB-TD   | HDPE-TD |         |
| C26  | 9.51  | 0.0001222  | 0.0005755 | TD-AT   | GB-TD   | HDPE-TD |         |
| C93  | 8.12  | 0.0003681  | 0.0016795 | TD-AT   | GB-AT   |         |         |
| C70  | 7.69  | 0.0005254  | 0.0023245 | TD-AT   | GB-TD   | HDPE-TD |         |
| C89  | 7.29  | 0.0007348  | 0.0031552 | GB-AT   | HDPE-AT | GB-TD   | HDPE-TD |
| C59  | 6.94  | 0.0009946  | 0.0041487 | TD-AT   | GB-TD   | HDPE-TD |         |
| C25  | 6.43  | 0.0015653  | 0.006348  | TD-AT   | HDPE-TD |         |         |
| C51  | 6.30  | 0.001753   | 0.0068931 | GB-AT   |         |         |         |
| C58  | 6.28  | 0.0017941  | 0.0068931 | TD-AT   | GB-TD   | HDPE-TD |         |
| C28  | 6.05  | 0.002212   | 0.0082807 | TD-AT   |         |         |         |
| C111 | 5.91  | 0.0025     | 0.0091251 | HDPE-TD |         |         |         |
| C74  | 5.38  | 0.0040971  | 0.01459   | TD-AT   | GB-TD   |         |         |
| C14  | 5.32  | 0.0043405  | 0.015088  | GB-TD   |         |         |         |
| C30  | 5.26  | 0.0045839  | 0.015564  | TD-AT   |         |         |         |
| C45  | 5.04  | 0.0056648  | 0.018797  | TD-AT   | HDPE-TD |         |         |
| C62  | 4.81  | 0.0071021  | 0.023043  | GB-AT   | GB-TD   |         |         |
| C124 | 4.65  | 0.0083112  | 0.026379  | TD-AT   | HDPE-TD |         |         |
| C27  | 4.52  | 0.0094624  | 0.029394  | TD-AT   |         |         |         |
| C140 | 4.48  | 0.0098234  | 0.02988   | TD-AT   | HDPE-TD |         |         |
| C24  | 4.37  | 0.010923   | 0.032547  | TD-AT   |         |         |         |
| C34  | 4.18  | 0.013202   | 0.038549  | TD-AT   |         |         |         |

52

53 Table S5: RF 15 VOC relative abundance based on different storage conditions

54

|      | VOC<br>%Rel.<br>abundance | C5   | C31  | C33  | C37  | C38  | C51  | C57  | C60  | C78  | C106 | C108 | C120 | C133 | C135 | C136 |
|------|---------------------------|------|------|------|------|------|------|------|------|------|------|------|------|------|------|------|
| HDPE | average                   | 0.12 | 0.67 | 0.93 | 0.71 | 0.96 | 0.78 | 0.88 | 0.94 | 1.69 | 1.09 | 0.15 | 1.70 | 3.58 | 4.32 | 6.54 |
|      | SE                        | 0.00 | 0.07 | 0.19 | 0.03 | 0.02 | 0.12 | 0.07 | 0.02 | 0.08 | 0.29 | 0.00 | 0.16 | 0.48 | 0.13 | 0.18 |
| AT   | average                   | 0.13 | 0.45 | 1.08 | 0.80 | 0.87 | 0.56 | 1.09 | 0.79 | 1.77 | 1.33 | 0.16 | 1.84 | 3.31 | 3.75 | 6.03 |
|      | SE                        | 0.00 | 0.09 | 0.15 | 0.03 | 0.03 | 0.11 | 0.13 | 0.06 | 0.05 | 0.24 | 0.00 | 0.05 | 0.29 | 0.08 | 0.46 |
| GB   | average                   | 0.13 | 1.00 | 0.15 | 0.98 | 1.28 | 1.26 | 0.86 | 0.87 | 0.77 | 0.96 | 0.16 | 0.93 | 2.34 | 3.87 | 4.99 |
|      | SE                        | 0.00 | 0.12 | 0.00 | 0.07 | 0.04 | 0.03 | 0.06 | 0.05 | 0.02 | 0.21 | 0.01 | 0.06 | 0.36 | 0.08 | 0.40 |
| TD   | average                   | 0.44 | 2.35 | 0.44 | 1.45 | 0.96 | 0.82 | 0.37 | 0.35 | 0.68 | 4.93 | 0.30 | 0.53 | 9.32 | 2.85 | 2.04 |
|      | SE                        | 0.02 | 0.10 | 0.05 | 0.04 | 0.05 | 0.04 | 0.04 | 0.02 | 0.02 | 0.26 | 0.03 | 0.03 | 0.38 | 0.14 | 0.10 |

55

56

57

58

59

60 Table S6: Cannabinoids content based on different storage conditions.

61

|      | % w/w   | CBGA* | CBDA** | THC  | CBC  | THCA | CBG* | CBD** |
|------|---------|-------|--------|------|------|------|------|-------|
| HDPE | average | 11.65 | 12.86  | 0.07 | 0.07 | 0.27 | 1.14 | 0.59  |
|      | SE      | 0.10  | 0.59   | 0.01 | 0    | 0.04 | 0    | 0.01  |
| AT   | average | 11.76 | 12.57  | 0.05 | 0.07 | 0.32 | 1.13 | 0.51  |
|      | SE      | 0.07  | 0.36   | 0    | 0    | 0.04 | 0    | 0.01  |
| GB   | average | 10.27 | 11.89  | 0.17 | 0.17 | 0.24 | 1.44 | 1.42  |
|      | SE      | 0.01  | 1.00   | 0.02 | 0    | 0.04 | 0.02 | 0.06  |
| TD   | average | 11.65 | 12.34  | 0.07 | 0.05 | 0.36 | 1.43 | 1.14  |
|      | SE      | 0.11  | 0.74   | 0.01 | 0    | 0.05 | 0.02 | 0.08  |

62
